# Supplementary material for: Compositionally tuned hybridization of n-type Ag0 : Ag2Se under ambient conditions towards excellent thermoelectric properties at room temperature
Source: Royal Society of Chemistry journal article supplement (doi:10.1039/d3qm00123g), 2023-01-01
Supplement: d3qm00123g1.pdf [file d3qm00123g1.pdf]

## Supporting information

### Compositionally tuned hybridization of n-type $\text{Ag}^0:\text{Ag}_2\text{Se}$ at ambient conditions towards excellent thermoelectric properties at room temperature

Author Si Yin Tee,\* Daniel Ponsford, Xian Yi Tan, Xiaobai Wang, Chee Leng Lay, Coryl Jing Jun Lee, Xi Ping Ni, Debbie Hwee Leng Seng, Warintorn Thitsartarn, Guijian Guan, and Ming-Yong Han\*

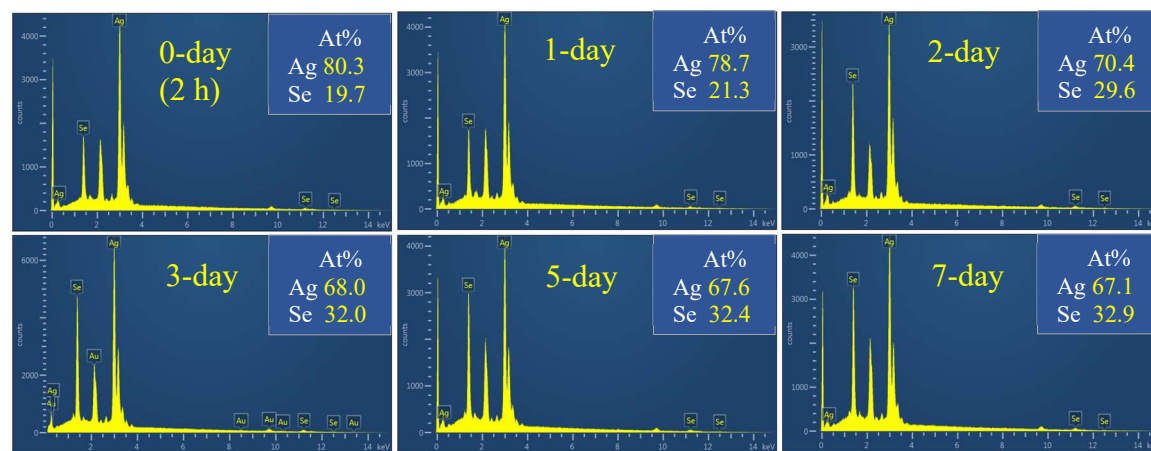

**Fig. S1.** SEM EDX spectra of the as-synthesized  $\text{Ag}^0:\text{Ag}_2\text{Se}$  powders obtained after reaction for 2, 24, 48, 72, 120, and 168 h (denoted as Day 0-, 1-, 2-, 3-, 5-, and 7-day in the figure), possessing the molar ratios of Ag/Se of 4.07, 3.69, 2.38, 2.13, 2.09, and 2.04, respectively.

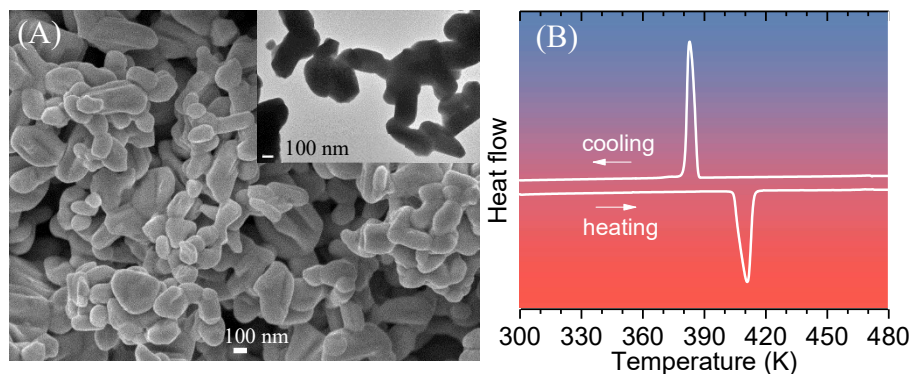

**Fig. S2.** (A) SEM and TEM (inset) images of the as-synthesized 1.96% Ag<sup>0</sup>:Ag<sub>2</sub>Se powder at room temperature after 7 days of reaction. (B) Differential scanning calorimetry (DSC) thermogram of 1.96% Ag<sup>0</sup>:Ag<sub>2</sub>Se powder.

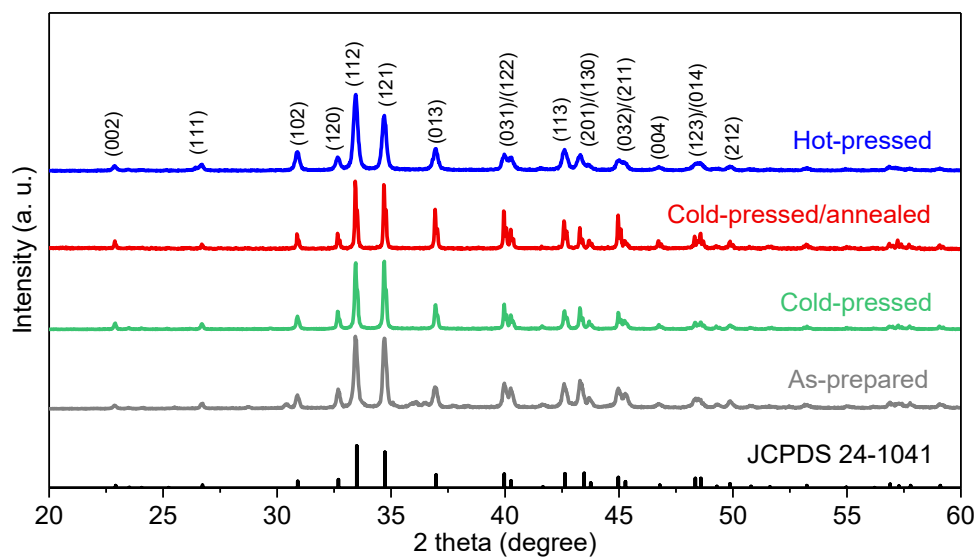

**Fig. S3.** XRD patterns of the as-synthesized 1.96% Ag<sup>0</sup>:Ag<sub>2</sub>Se powder (after 7 days of reaction), cold-pressed pellet (RT, 303 K), cold-pressed/annealed pellet (200 °C), and hot-pressed pellet (SPS at 200 °C).

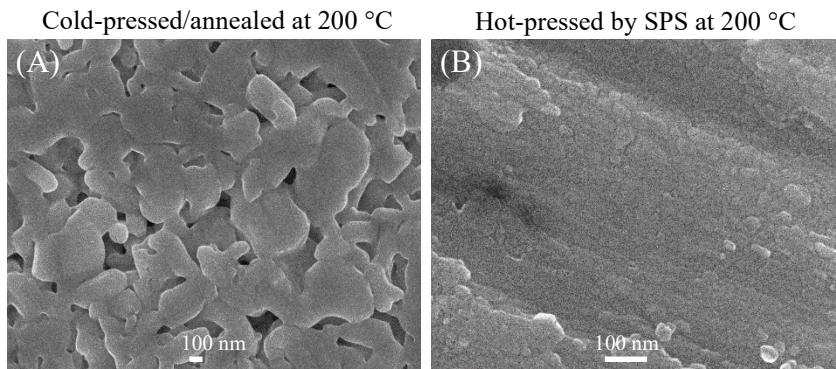

**Fig. S4.** SEM images of 1.96%  $\text{Ag}^0:\text{Ag}_2\text{Se}$  pellet after (A) cold-pressed/annealed at 200 °C and (B) hot-pressed at 200 °C by SPS.

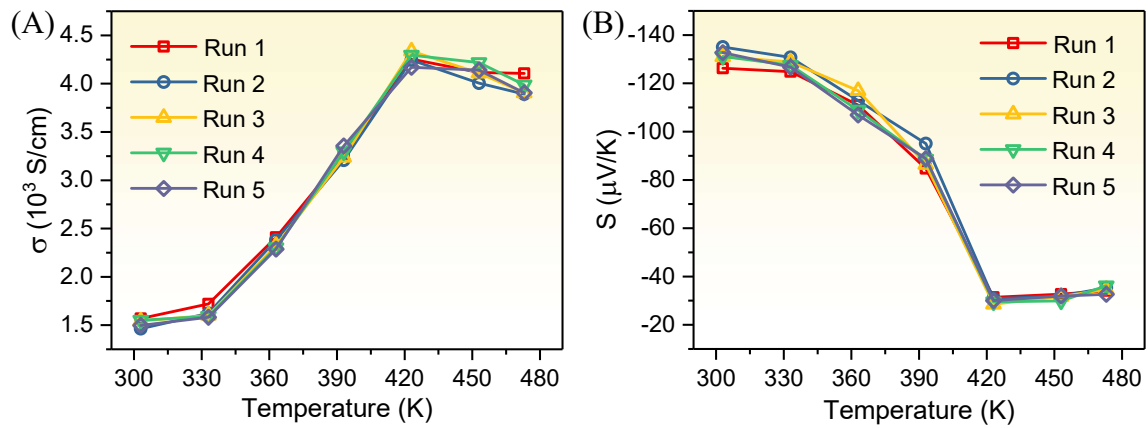

**Fig. S5.** Thermoelectric performance of 1.96%  $\text{Ag}^0:\text{Ag}_2\text{Se}$  pellet for 5 cycles (A) temperature-dependent  $\sigma$  and (B) temperature-dependent  $S$ .

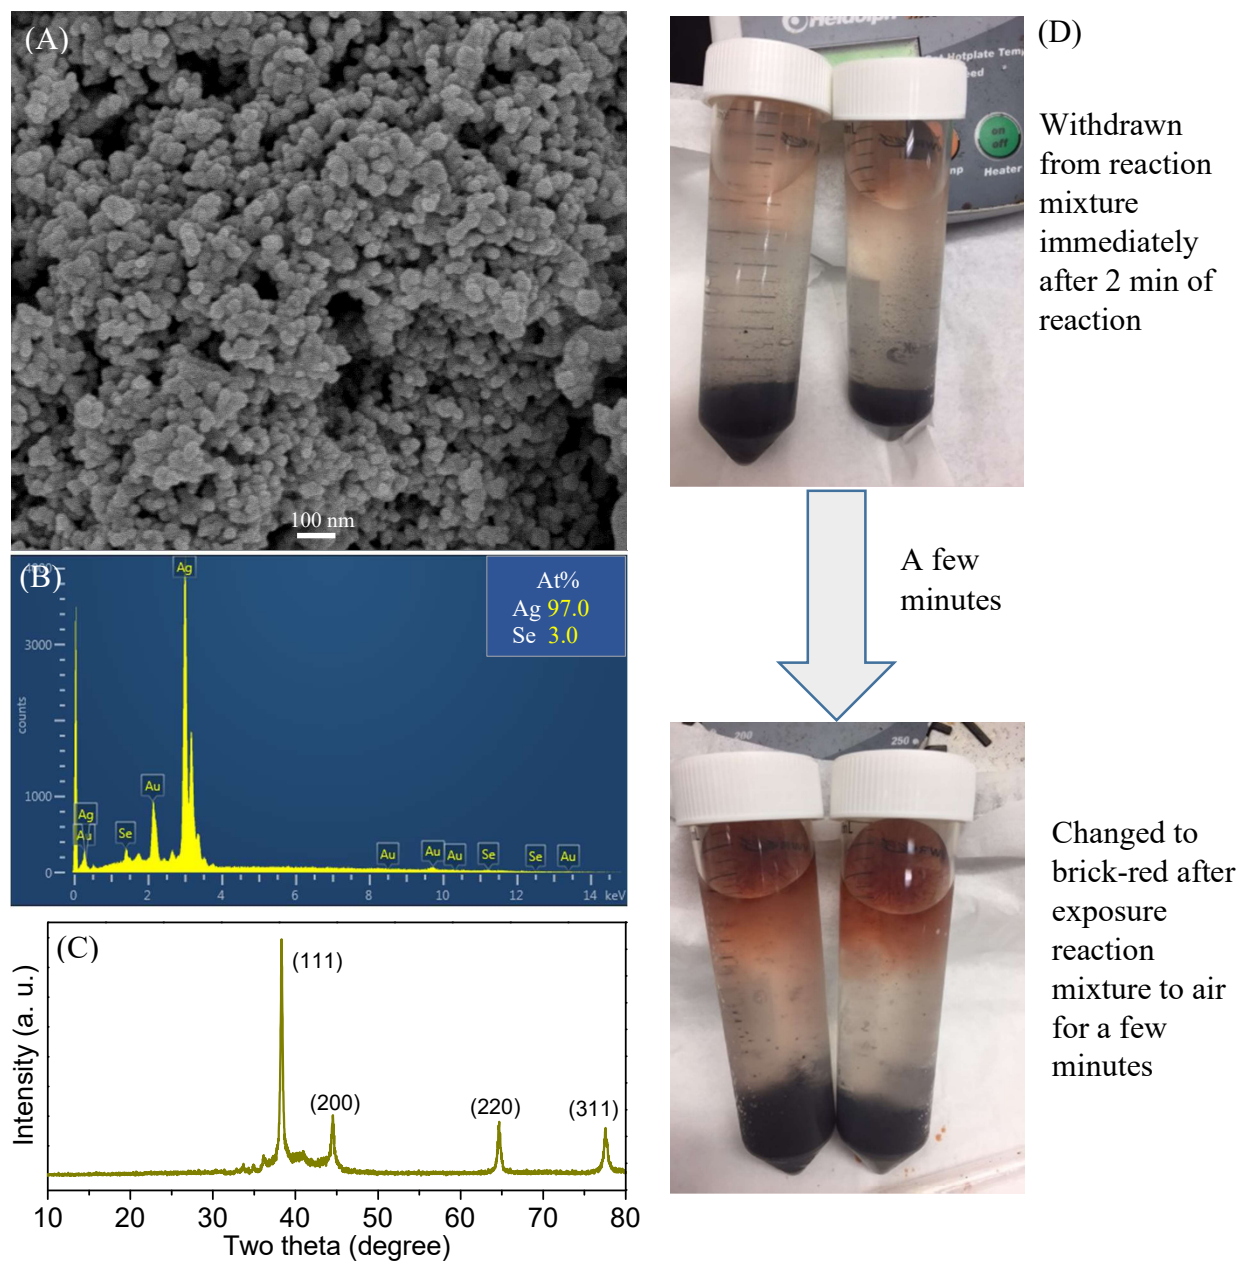

**Fig. S6.** (A) SEM image, (B) EDX spectrum and (C) XRD pattern of the as-synthesized 93.81%  $\text{Ag}^0:\text{Ag}_2\text{Se}$  nanoparticles for 2 min of reaction of  $\text{NaBH}_4$  with  $\text{AgNO}_3$  in the presence of  $\text{HSe}^-$ . (D) Optical images of the as-synthesized 93.81%  $\text{Ag}^0:\text{Ag}_2\text{Se}$  after 2 min of reaction, and upon exposure of freshly formed  $\text{Ag}^0$  nanoparticles to air for a few minutes.

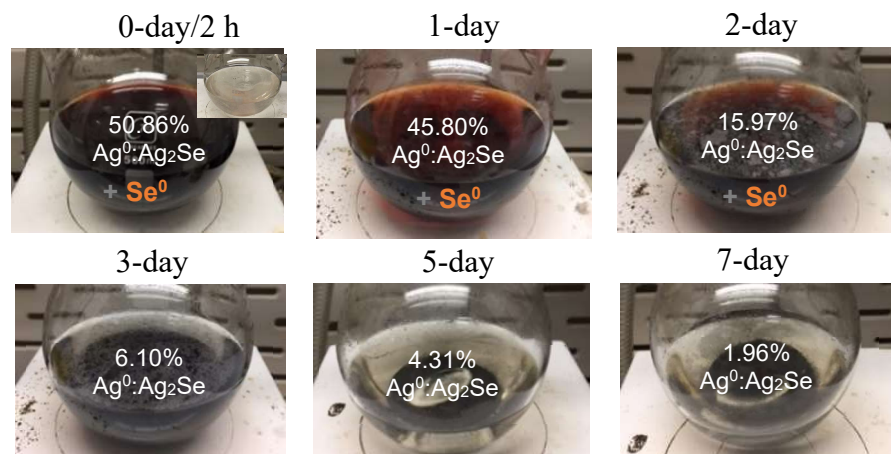

**Fig. S7.** Optical images of the as-synthesized  $\text{Ag}^0:\text{Ag}_2\text{Se}$  after reaction at room temperature for 0, 1, 2, 3, 5, and 7 days, corresponding to excessive  $\text{Ag}^0$  at 50.86%, 45.80%, 15.97%, 6.10%, 4.31%, and 1.96%, respectively. Inset is the colourless solution of  $\text{Na}_2\text{Se}$  after chemical reduction of  $\text{Na}_2\text{SeO}_3$  by  $\text{NaBH}_4$ .

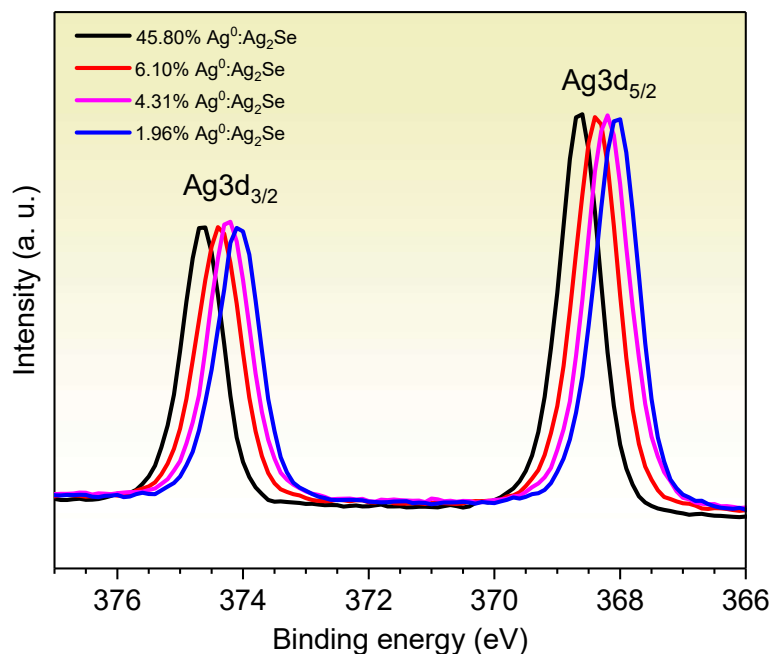

**Fig. S8.** Ag 3d XPS spectra of the as-synthesized  $\text{Ag}^0:\text{Ag}_2\text{Se}$  powders with excessive  $\text{Ag}^0$  at 93.81%, 6.10%, 4.31%, and 1.96% after reaction for 2 min, 3 days, 5 days, and 7 days, respectively.

**Table S1.** Literature comparison between our work with bulk Ag<sub>2</sub>Se and hybridized Ag<sub>2</sub>Se

| Materials                                                                  | Figure of merit (ZT)         | Synthesis method               | Ref.     |
|----------------------------------------------------------------------------|------------------------------|--------------------------------|----------|
| <b>Ag<sub>2</sub>Se</b>                                                    |                              |                                |          |
| Ag <sub>2</sub> Se                                                         | 0.6 (300 K)                  | Hydrothermal                   | 1        |
| Ag <sub>2</sub> Se                                                         | 0.13 (300 K)                 | Colloidal synthesis            | 2        |
| Ag <sub>2</sub> Se                                                         | 0.45 (323 K)                 | Chemical synthesis             | 3        |
| Ag <sub>2</sub> Se                                                         | 0.55 (300 K)                 | Colloidal synthesis            | 4        |
| Ag <sub>2</sub> Se                                                         | 0.7 (317 K)                  | Solvothermal                   | 5        |
| Ag <sub>2</sub> Se                                                         | 0.514 (300 K)                | Chemical synthesis             | 6        |
| <b>Ag<sub>2</sub>Se hybridized with other inorganic components</b>         |                              |                                |          |
| 1.96% Ag <sup>0</sup> :Ag <sub>2</sub> Se                                  | 0.89 (303 K)                 | Chemical synthesis             | Our work |
| (Cu <sub>2</sub> Se) <sub>0.05</sub> /(Ag <sub>2</sub> Se) <sub>0.95</sub> | 0.15 (300 K)<br>0.45 (875 K) | Microwave-assisted thermolysis | 7        |
| Ag <sub>2</sub> Se/Ag/CuAgS/nylon                                          | 0.5 (300 K)                  | Chemical synthesis             | 8        |
| Ag <sub>2</sub> Se/MWCNTs                                                  | 0.05 (300 K)                 | Solvothermal                   | 9        |
| Ag <sub>2</sub> Se/MWCNTs                                                  | 0.18 (300 K)                 | Solvothermal                   | 10       |
| Ag <sub>2</sub> Se/RGO                                                     | 0.39 (363 K)                 | Hydrothermal                   | 11       |
| Ag <sub>2</sub> Se/MWCNTs/polyaniline                                      | 0.012 (300 K)                | Chemical synthesis             | 12       |

MWCNTs: multiwalled carbon nanotubes, RGO: reduced graphene oxide

## References

1. H. Wang, W. Chu, D. Wang, W. Mao, W. Pan, Y. Guo, Y. Xiong and H. Jin, Low-Temperature Thermoelectric Properties of  $\beta$ -Ag<sub>2</sub>Se Synthesized by Hydrothermal Reaction, *J. Electron. Mater.*, 2011, **40**, 624-628.
2. C. Xiao, J. Xu, K. Li, J. Feng, J. Yang and Y. Xie, Superionic phase transition in silver chalcogenide nanocrystals realizing optimized thermoelectric performance, *J. Am. Chem. Soc.*, 2012, **134**, 4287-4293.
3. C. Han, Z. Li, G. Q. Lu and S. Xue Dou, Robust scalable synthesis of surfactant-free thermoelectric metal chalcogenide nanostructures, *Nano Energy*, 2015, **15**, 193-204.
4. K. H. Lim, K. W. Wong, Y. Liu, Y. Zhang, D. Cadavid, A. Cabot and K. M. Ng, Critical role of nano-inclusions in silver selenide nanocomposites as a promising room temperature thermoelectric material, *J. Mater. Chem. C*, 2019, **7**, 2646-2652.
5. D. Li, J. H. Zhang, J. M. Li, J. Zhang and X. Y. Qin, High thermoelectric performance for an Ag<sub>2</sub>Se-based material prepared by a wet chemical method, *Mater. Chem. Front.*, 2020, **4**, 875-880.
6. D. Lee, W. Park, Y. A. Kang, H. T. Lim, S. Park, Y. Mun, J. Kim and K. S. Jang, Substrate-Free Thermoelectric 25  $\mu$ m-Thick Ag<sub>2</sub>Se Films with High Flexibility and In-Plane zT of 0.5 at Room Temperature, *ACS Appl. Mater. Interfaces*, 2023, **15**, 3047-3053.
7. S. Ballikaya, Y. Oner, T. Temel, B. Ozkal, T. P. Bailey, M. S. Toprak and C. Uher, Thermoelectric and thermal stability improvements in Nano-Cu<sub>2</sub>Se included Ag<sub>2</sub>Se, *J. Solid State Chem.*, 2019, **273**, 122-127.
8. Y. Lu, Y. Qiu, K. Cai, Y. Ding, M. Wang, C. Jiang, Q. Yao, C. Huang, L. Chen and J. He, Ultrahigh power factor and flexible silver selenide-based composite film for thermoelectric devices, *Energy Environ. Sci.*, 2020, **13**, 1240-1249.
9. N. Chen, C. Ren, L. Sun, H. Xue, H. Yang, X. An, X. Yang, J. Zhang and P. Che, Improved thermoelectric properties of multi-walled carbon nanotubes/Ag<sub>2</sub>Se via controlling the composite ratio, *CrystEngComm*, 2022, **24**, 260-268.
10. D. Park, M. Kim and J. Kim, Preparation and structure dependent thermoelectric properties of flexible N-type nanostructured silver(I) selenide/multi-walled carbon nanotube composite film, *Appl. Surf. Sci.*, 2023, **613**.
11. R. Santhosh, R. Abinaya, J. Archana, S. Ponnusamy, S. Harish and M. Navaneethan, Controlled grain boundary interfaces of reduced graphene oxide in Ag<sub>2</sub>Se matrix for low lattice thermal conductivity and enhanced power factor for thermoelectric applications, *J. Power Sources*, 2022, **525**.
12. A. S. Kshirsagar, C. Hiragond, A. Dey, P. V. More and P. K. Khanna, Band Engineered I/III/V-VI Binary Metal Selenide/MWCNT/PANI Nanocomposites for Potential Room Temperature Thermoelectric Applications, *ACS Appl. Energy Mater.*, 2019, **2**, 2680-2691.
